# Supplementary material
Source: HighWire-hosted journal article supplement (https://rmdopen.bmj.com/content/3/2/e000481)
Supplement: inline-supplementary-material-1 [file inline-supplementary-material-1.docx]

**Search histories**

Searches performed December 11 2016

| PubMed | | |
| --- | --- | --- |
| #4 | #1 AND #2 AND #3 | 553 |
| #3 | ("Clinical Trials as Topic"[Mesh] OR "Double-Blind Method"[Mesh] OR "Single-Blind Method"[Mesh] OR "drug therapy"[Subheading] OR "Research Design"[Mesh] OR "Placebos"[Mesh] OR "Random Allocation"[Mesh] OR "Randomized Controlled Trials as Topic"[Mesh] OR "Double-Blind Method"[Mesh] OR "Randomized Controlled Trial" [Publication Type] OR "Practice Guideline"[Publication Type] OR "Clinical Trial"[Publication Type] OR "Controlled Clinical Trial"[Publication Type] OR single blind[Title/Abstract] OR single blinded[Title/Abstract] OR single masked[Title/Abstract] OR double blind[Title/Abstract] OR double blinded[Title/Abstract] OR double masked[Title/Abstract] OR triple blind[Title/Abstract] OR triple blinded[Title/Abstract] OR triple masked[Title/Abstract] OR double-blind* OR random allocation[Title/Abstract] OR random allocations[Title/Abstract] OR random allocated[Title/Abstract] OR randomly allocated[Title/Abstract] OR clinical trial[Title/Abstract] OR clinical trials[Title/Abstract] OR placebo*[Title/Abstract] OR random* OR trial*[Title/Abstract]) NOT (case report[Title/Abstract] OR letter[Publication Type] OR historical article[Publication Type] OR "review of reported cases" OR multicase review[Publication Type]) | 3073642 |
| #2 | rheumatoid arthritis OR ((rheumatoid OR reumatoid OR rheumatic OR reumatic OR rheumat* OR reumat*) AND (arthrit* OR artrit* OR diseas* OR condition* OR nodule*)) | 214644 |
| #1 | (nurse OR nurses OR nursing OR nurse practitioner OR advanced nurse practitioner OR nurse consultation OR nurse-led OR nurseled OR nurse clinicians OR nurse clinician OR “NLC” OR Nurse's Practice Pattern OR nurse practice patterns)) | 717083 |

| Embase | | |
| --- | --- | --- |
| #1 | ((rheumatoid arthritis or ((rheumatoid or reumatoid or rheumatic or reumatic or rheumat* or reumat*)) and (arthrit* or artrit* or diseas* or condition* or nodule*))).mp. [mp=title, abstract, heading word, drug trade name, original title, device manufacturer, drug manufacturer, device trade name, keyword] | 270183 |
| #2 | exp rheumatoid arthritis/ | 165310 |
| #3 | 1 OR 2 | 271137 |
| #4 | exp nurse/ | 128553 |
| #5 | exp nursing care/ or exp nursing/ or exp nursing practice/ or exp "quality of nursing care"/ | 349326 |
| #6 | (nurse or nurses or nursing or nurse practitioner or advanced nurse practitioner or nurse consultation or nurse consultations or nurse-led or nurseled or nurse clinicians or nurse clinician or NLC or Nurs* Practice).mp. [mp=title, abstract, heading word, drug trade name, original title, device manufacturer, drug manufacturer, device trade name, keyword] | 663726 |
| #7 | 4 or 5 or 6 | 665080 |
| #8 | (((singl* or doubl* or treb* or tripl*) adj (blind*3 or mask$3)) or (allocated adj2 random)).tw. or (clin* adj25 trial*).ti,ab. or (clinic: adj trial$1).tw. or (double-blind* or random*).af. or exp "clinical trial (topic)"/ or exp double blind procedure/ or exp single blind procedure/ or exp triple blind procedure/ or placebo*.tw. or exp placebo/ or exp randomization/ or Random.af. or Random*.tw. or exp "randomized controlled trial (topic)"/ or randomized.ab. or randomly allocated.tw. or randomly.ab. or trial.ab. or trial.ti. or exp "controlled clinical trial (topic)"/ or randomized controlled trial/ or "randomized controlled trial (topic)"/ or exp controlled clinical trial/ | 1925440 |
| #9 | 3 and 7 and 8 | 320 |

| Cinahl | | |
| --- | --- | --- |
| S10 | S3 AND S6 AND S9 | 82 |
| S9 | S7 OR S8 | 304,603 |
| S8 | (MH "Randomized Controlled Trials") OR (MH "Clinical Trials+") | 132,527 |
| S7 | Clinical Trials as Topic OR Double-Blind Method OR Single-Blind Method OR Research Design OR Placebos OR Random Allocation OR Randomized Controlled Trials as Topic OR Double-Blind Method OR Randomized Controlled Trial OR Practice Guideline OR Clinical Trial OR Controlled Clinical Trial OR single blind OR single blinded OR single masked OR double blind OR double blinded OR double masked OR triple blind OR triple blinded OR triple masked OR double-blind* OR random allocation OR random allocations OR random allocated OR randomly allocated OR clinical trial OR clinical trials OR placebo* OR random* OR trial* | 304,603 |
| S6 | S4 OR S5 | 617,054 |
| S5 | (MH "Nurses+") | 158,864 |
| S4 | (nurse OR nurses OR nursing OR nurse practitioner OR advanced nurse practitioner OR nurse consultation OR nurse consultations OR nurse-led OR nurseled OR nurse clinicians OR nurse clinician OR NLC OR Nurse* Practice Pattern) | 614,403 |
| S3 | S1 OR S2 | 18,685 |
| S2 | rheumatoid arthritis ((rheumatoid OR reumatoid OR rheumatic OR reumatic OR rheumat* OR reumat*) AND (arthrit* OR artrit* OR diseas* OR condition* OR nodule*)) | 17,014 |
| S1 | (MH "Arthritis, Rheumatoid+") | 13,440 |

| the Cochrane Central Register of Controlled Trials [CENTRAL], | | |
| --- | --- | --- |
| #1 | MeSH descriptor: [Nurses] explode all trees | 1014 |
| #2 | MeSH descriptor: [Nursing] explode all trees | 3074 |
| #3 | MeSH descriptor: [Nurse's Practice Patterns] explode all trees | 64 |
| #4 | (nurse or nurses or nursing or nurse practitioner or advanced nurse practitioner or nurse consultation or nurse consultations or nurse-led or nurseled or nurse clinicians or nurse clinician or "NLC" or Nurse's Practice Pattern) | 28689 |
| #5 | MeSH descriptor: [Arthritis, Rheumatoid] explode all trees | 4207 |
| #6 | rheumatoid arthritis or (rheumatoid or reumatoid or rheumatic or reumatic or rheumat* or reumat*) and (arthrit* or artrit* or diseas* or condition* or nodule*) | 13358 |
| #7 | #1 or #2 or #3 or #4 | 28847 |
| #8 | #5 or #6 | 13455 |
| #9 | #7 and #8 | 553 |
| #10 | #9 (Trials) | 155 |

| PsycInfo | | |
| --- | --- | --- |
| #1 | exp Rheumatoid Arthritis/ | 1658 |
| #2 | (rheumatoid arthritis or ((rheumatoid or reumatoid or rheumatic or reumatic or rheumat* or reumat*) and (arthrit* or artrit* or diseas* or condition* or nodule*))).mp. [mp=title, abstract, heading word, table of contents, key concepts, original title, tests & measures] | 3273 |
| #3 | exp Nurses/ | 25010 |
| #4 | exp Nursing/ | 16486 |
| #5 | (nurse or nurses or nursing or nurse practitioner or advanced nurse practitioner or nurse consultation or nurse consultations or nurse-led or nurseled or nurse clinicians or nurse clinician or NLC or Nurse* Practice Pattern).mp. [mp=title, abstract, heading word, table of contents, key concepts, original title, tests & measures] | 77423 |
| #6 | (Clinical Trials as Topic or Double-Blind Method or Single-Blind Method or Research Design or Placebos or Random Allocation or Randomized Controlled Trials as Topic or Double-Blind Method or Randomized Controlled Trial or Practice Guideline or Clinical Trial or Controlled Clinical Trial or single blind or single blinded or single masked or double blind or double blinded or double masked or triple blind or triple blinded or triple masked or double-blind* or random allocation or random allocations or random allocated or randomly allocated or clinical trial or clinical trials or placebo* or random* or trial*).mp. [mp=title, abstract, heading word, table of contents, key concepts, original title, tests & measures] | 274440 |
| #7 | 1 or 2 | 3273 |
| #8 | 3 or 4 or 5 | 77423 |
| #9 | 6 and 7 and 8 | 20 |

| Web of Science | | |
| --- | --- | --- |
| #4 | #1 AND #2 AND #3 | 244 |
| #3 | (Clinical Trials as Topic OR Double-Blind Method OR Single-Blind Method OR Research Design OR Placebos OR Random Allocation OR Randomized Controlled Trials as Topic OR Double-Blind Method OR Randomized Controlled Trial OR Practice Guideline OR Clinical Trial OR Controlled Clinical Trial OR single blind OR single blinded OR single masked OR double blind OR double blinded OR double masked OR triple blind OR triple blinded OR triple masked OR double-blind* OR random allocation OR random allocations OR random allocated OR randomly allocated OR clinical trial OR clinical trials OR placebo* OR random* OR trial*) | 2,432,313 |
| #2 | rheumatoid arthritis OR ((rheumatoid OR reumatoid OR rheumatic OR reumatic OR rheumat* OR reumat*) AND (arthrit* OR artrit* OR diseas* OR condition* OR nodule*)) | 163,062 |
| #1 | nurse OR nurses OR nursing OR nurse practitioner OR advanced nurse practitioner OR nurse consultation OR nurse-led OR nurseled OR nurse clinicians OR nurse clinician OR “NLC” OR Nurse's Practice Pattern OR nurse practice patterns | 201,849 |

| Scopus | | |
| --- | --- | --- |
| #4 | #1 AND #2 AND #3 | 347 |
| #3 | Single-Blind* OR “Research Design” OR “Practice Guideline” OR “Clinical Trial” OR “single blind” OR “single blinded” OR “single masked” OR “double masked” OR “triple blind*” OR “double-blind*” OR placebo* OR random* OR trial* | 3,283,548 |
| #2 | “rheumatoid arthritis” OR ((rheumatoid OR reumatoid OR rheumatic OR reumatic OR rheumat* OR reumat*) AND (arthrit* OR artrit* OR diseas* OR condition* OR nodule*)) AND Nurs* OR NLC | 236,871 |
| #1 | Nurs* OR NLC | 724,891 |

| Clinicaltrials.gov | | |
| --- | --- | --- |
| #4 | #1 OR #2 OR #3 | 1 |
| #3 | “rheumatoid arthritis AND nurse-led | 1 |
| #2 | “rheumatoid arthritis AND “nurse consultations” | 0 |
| #1 | “rheumatoid arthritis AND “nurse consultation” | 0 |

| ISRCTN Registry | | |
| --- | --- | --- |
| #3 | rheumatoid arthritis AND nurs* | 1 |

| UK Clinical Trials | | |
| --- | --- | --- |
| #3 | rheumatoid arthritis [health condition] AND nurs* | 5 |

| UK Clinical Research Network Study Portfolio | | |
| --- | --- | --- |
| #3 | rheumatoid arthritis [health condition] AND nurs* | 3 |

| MRC Clinical Trials Unit | | |
| --- | --- | --- |
| #3 | rheumatoid arthritis AND nurs* | 0 |

| ProQuest Dissertations & Theses Global | | |
| --- | --- | --- |
| #1 | rheumatoid arthritis AND (nurse-led OR nurse consultation OR nurse consultations)* AND (*Clinical Trials as Topic OR Double-Blind Method OR Single-Blind Method OR Research Design OR Placebos OR Random Allocation OR Randomized Controlled Trials as Topic OR Double-Blind Method OR Randomized Controlled Trial OR Practice Guideline OR Clinical Trial OR Controlled Clinical Trial OR single blind OR single blinded OR single masked OR double blind OR double blinded OR double masked OR triple blind OR triple blinded OR triple masked OR double-blind* OR random allocation OR random allocations OR random allocated OR randomly allocated OR clinical trial OR clinical trials OR placebo* OR random* OR trial**) | 3 |
