# Supplementary material
Source: HighWire-hosted journal article supplement (https://rmdopen.bmj.com/content/3/2/e000481)
Supplement: inline-supplementary-material-2 [file inline-supplementary-material-2.docx]

**Supplementary 2, excluded studies**

Cho,S. K.; Kim,D.; Choi,J.; Lee,S.; Song,S. T.; Bae,G. E.; Kim,H. K.; Sung,Y. K.. Impact of patient education on the satisfaction of rheumatoid arthritis patient : A randomized trial of nurse-led vs. Physician-led education. Arthritis and Rheumatology 2015;67(Journal Article). Dougados 2013

Dougados, M.; Perrodeau, E.; Fayet, F.; Gaudin, P.; Cerato, M. H.; Le Loet, X.; Flipo, R. M.; Chabrefy, L.; Mouterde, G.; Euller-Ziegler, L.; Schaeverbeke, T.; Fautrel, B.; Saraux, A.; Valckaenaere, I.; Chales, G.; Dernis, E.; Richette, P.; Mariette, X.; Berenbaum, F.; Sibilia, J.; Ravaud, P.. Impact of a nurse led program of patient self-assessment of disease activity on the management of rheumatoid arthritis: Results of a prospective, multicentre, randomized, controlled trial (comedra). Annals of the Rheumatic Diseases 2013;72. Dougados 2015

Dougados,M.; Soubrier,M.; Perrodeau,E.; Gossec,L.; Fayet,F.; Gilson,M.; Cerato,M. H.; Pouplin,S.; Flipo,R. M.; Chabrefy,L.; Mouterde,G.; Euller-Ziegler,L.; Schaeverbeke,T.; Fautrel,B.; Saraux,A.; Chary-Valckenaere,I.; Chales,G.; Dernis,E.; Richette,P.; Mariette,X.; Berenbaum,F.; Sibilia,J.; Ravaud,P.. Impact of a nurse-led programme on comorbidity management and impact of a patient self-assessment of disease activity on the management of rheumatoid arthritis: Results of a prospective, multicentre, randomised, controlled trial (COMEDRA). Annals of the Rheumatic Diseases 2015;74(Journal Article):1725-1733. Dougados 2015a

Dougados,M.; Soubrier,M.; Perrodeau,E.; Gossec,L.; Fayet,F.; Gilson,M.; Cerato,M. H.; Pouplin,S.; Flipo,R. M.; Chabrefy,L.; Mouterde,G.; Euller-Ziegler,L.; Schaeverbeke,T.; Fautrel,B.; Saraux,A.; Chary-Valckenaere,I.; Chales,G.; Dernis,E.; Richette,P.; Mariette,X.; Berenbaum,F.; Sibilia,J.; Ravaud,P.. Pmc4552897; Impact of a nurse-led programme on comorbidity management and impact of a patient self-assessment of disease activity on the management of rheumatoid arthritis: results of a prospective, multicentre, randomised, controlled trial (COMEDRA). Ann Rheum Dis 2015;2014/05/30(Journal Article):1725-1733. Garner 2009

Garner,Stephanie. A nurse-led rheumatology clinic in the Canadian setting. 2009;MR54530(Dissertation/Thesis):233. Hill 1994

Hill,J.; Bird,H. A.; Harmer,R.; Wright,V.; Lawton,C.. An evaluation of the effectiveness, safety and acceptability of a nurse practitioner in a rheumatology outpatient clinic. Br J Rheumatol 1994;1994/03/01(Journal Article):283-288. Hill 1997

Hill,J.. Patient satisfaction in a nurse-led rheumatology clinic. J Adv Nurs 1997;1997/02/01(Journal Article):347-354. Larsson 2012

Larsson,I.; Fridlund,B.; Arvidsson,B.; Teleman,A.; Bergman,S.. Treatment outcomes from a nurse-led rheumatology clinic in monitoring of anti-TNF therapy-a randomised controlled trial. Arthritis and Rheumatism 2012;64(Journal Article):S667. Larsson 2013

Larsson,I.; Arvidsson,B.; Fridlund,B.; Teleman,A.; Bergman,S.. Nurse-led rheumatology clinic versus rheumatologist clinic in monitoring of biological therapy-a randomised controlled study. Annals of the Rheumatic Disease 2013;71(Journal Article). Larsson 2014a

Larsson, Ingrid; Fridlund, Bengt; Arvidsson, Barbro; Teleman, Annika; Bergman, Stefan. Randomized controlled trial of a nurse-led rheumatology clinic for monitoring biological therapy. Journal of Advanced Nursing 2014;70(1):164-175. Larsson 2014b

Larsson, I.; Fridlund, B.; Arvidsson, B.; Teleman, A.; Bergman, S.. Biological therapy can be monitored more cost effectively by a nurse-led rheumatology clinic. Annals of the Rheumatic Diseases 2014;73. Larsson 2015

Larsson,I.; Fridlund,B.; Arvidsson,B.; Teleman,A.; Svedberg,P.; Bergman,S.. A nurse-led rheumatology clinic versus rheumatologist-led clinic in monitoring of patients with chronic inflammatory arthritis undergoing biological therapy: a cost comparison study in a randomised controlled trial. Bmc Musculoskeletal Disorders 2015;16(Journal Article):10. Larsson 2015a

Larsson,I.; Fridlund,B.; Arvidsson,B.; Teleman,A.; Svedberg,P.; Bergman,S.. Pmc4647492; A nurse-led rheumatology clinic versus rheumatologist-led clinic in monitoring of patients with chronic inflammatory arthritis undergoing biological therapy: a cost comparison study in a randomised controlled trial. BMC Musculoskelet Disord 2015;2015/11/18(Journal Article):354. McBain 2014

McBain,H.; Shipley,M.; Olaleye,A.; Moore,S.; Newman,S. P.. A self-monitoring and patient-initiated follow-up service for patients with rheumatoid or psoriatic arthritis: A randomized controlled trial. Annals of the Rheumatic Diseases 2014;73(Journal Article). McBain 2015

McBain,H.; Shipley,M.; Olaleye,A.; Moore,S.; Newman,S.. A patient-initiated DMARD self-monitoring service for people with rheumatoid or psoriatic arthritis on methotrexate: a randomised controlled trial. Ann Rheum Dis 2015;2015/08/21(Journal Article). Ndosi 2009

Ndosi,M.; Hill,J.; Hale,C.. Is nurse-led care for RA patients clinically effective? Arthritis and Rheumatism 2009;60(Journal Article):1981. Ndosi 2011

Ndosi,M.; Vinall,K.; Hale,C.; Bird,H.; Hill,J.. The effectiveness of nurse-led care in people with rheumatoid arthritis: a systematic review. Int J Nurs Stud 2011;2011/03/12(Journal Article):642-654.

1. Ndosi 2011a

Ndosi,M.; Lewis,M.; Hale,C.; Quinn,H.; Ryan,S.; Emery,P.; Bird,H.; Hill,J.. Pmc3629570; A randomised, controlled study of outcome and cost effectiveness for RA patients attending nurse-led rheumatology clinics: study protocol of an ongoing nationwide multi-centre study. Int J Nurs Stud 2011;2011/02/22(Journal Article):995-1001. Ndosi 2011b

Ndosi,M. E.. Outcomes of nurse-led care for people with rheumatoid arthritis: a nation-wide multicentre randomised controlled study. 2011;Ph.D.(Dissertation/Thesis):N.PAG p-N.PAG p 1p. Ndosi 2012

Ndosi,M.; Lewis,M.; Hale,C.; Bird,H.; Ryan,S.; Quinn,H.; McIvor,E.; Taylor,J.; Burbage,G.; Bond,D.; White,J.; Chagadama,D.; Green,S.; Kay,L.; Pace,A. V.; Bejarano,V.; Emery,P.; Hill,J.. Cost effectiveness of nurse-led care for people with rheumatoid arthritis: A multicentre rct. Arthritis and Rheumatism 2012;64(Journal Article):S736-S737.

1. Ndosi 2013

Ndosi,M.; Lewis,M.; Hale,C.; Quinn,H.; Ryan,S.; Emery,P.; Bird,H.; Hill,J.. The outcome and cost-effectiveness of nurse-led care in people with rheumatoid arthritis: A multicentre randomised controlled trial. Annals of the Rheumatic Diseases 2013;(Journal Article). Ndosi 2013a

Ndosi,M.; Lewis,M.; Hale,C.; Bird,H.; Ryan,S.; Quinn,H.; McIvor,E.; Taylor,J.; Burbage,G.; Bond,D.; White,J.; Chagadama,D.; Green,S.; Kay,L.; Pace,A. V.; Bejarano,V.; Emery,P.; Hill,J.. The cost-effectiveness of nurse-led care in people with RA. Rheumatology (United Kingdom) 2013;52(Journal Article):i10. Ndosi 2014a

Ndosi,M.; Lewis,M.; Hale,C.; Quinn,H.; Ryan,S.; Emery,P.; Bird,H.; Hill,J.. Pmc4215359; The outcome and cost-effectiveness of nurse-led care in people with rheumatoid arthritis: a multicentre randomised controlled trial. Ann Rheum Dis 2014;2013/08/29(Journal Article):1975-1982. [DOI: 10.1136/annrheumdis-2013-203403]

1. Primdahl 2010

Primdahl,J.; Wagner,L.; Horslev-Petersen,K.. Self-efficacy and follow-up with nursing, medical or shared care for outpatients with rheumatoid arthritis. Arthritis and Rheumatism 2010;62(Journal Article):2280. Primdahl 2012a

Primdahl,J.; Horn,H. C.; Petersen,R.; Horslev-Petersen,K.. CLINICAL AND RADIOLOGICAL OUTCOME IN OUTPATIENTS WITH RHEUMATOID ARTHRITIS FOLLOWED BY MEDICAL, NURSING OR SHARED CARE A TWO YEAR RANDOMISED CONTROLLED TRIAL. Annals of the Rheumatic Diseases 2012;71(Journal Article):92-92.

1. Primdahl 2012b

Primdahl,J.; Horn,H. C.; Horslev-Petersen,K.. Shared care and nursing consultations: A useful alternative to rheumatologist-initiated follow-up in outpatients with rheumatoid arthritis. Results from a 2-year randomized controlled trial. Scandinavian journal of rheumatology 2012;41(Journal Article):35-36. Primdahl 2013

Primdahl,J.; Horn,H. C.; Petersen,R.; Horslev-Petersen,K.. Clinical and radiological outcome in outpatients with rheumatoid arthritis followed by medical, nursing or shared care-a two year randomised controlled trial. Annals of the Rheumatic Disease 2013;71(Journal Article). Rajaram 2012

Rajaram,R.; Liu,H. J.; Tan,A. M.; Ang,S. Y.; Tay,A. C.; Loy,K. L.; Ong,C. E.; Chong,N. C.; Lim,N. Y.. Effectiveness of nurse-led services in the acute care setting-a systematic review of randomized controlled trials. Proceedings of Singapore Healthcare 2012;21(Journal Article):S53. Raspe 1992

Raspe,H. H.; Deck,R.; Mattussek,S.. The outcome of traditional or comprehensive outpatient care for rheumatoid arthritis (RA). Results of an open, non-randomized, 2-year prospective study. Z Rheumatol 1992;1992/01/01(Journal Article):61-66. Ryan 2006

Ryan,S.; Hassell,A. B.; Lewis,M.; Farrell,A.. Impact of a rheumatology expert nurse on the wellbeing of patients attending a drug monitoring clinic. J Adv Nurs 2006;2006/01/31(Journal Article):277-286. Solomon 2014

Solomon,D. H.; Fraenkel,L.; Lu,B.; Brown,E.; Tsao,P. H.; Losina,E.; Katz,J. N.; Bitton,A.. Is team care better? A comparison of rheumatoid arthritis disease activity among patients cared for in practices with nurse practitioners and physicians assistants versus rheumatologist only. Arthritis and Rheumatology 2014;66(Journal Article):S794. Soubrier 2013

Soubrier,M.; Perrodeau,E.; Gaudin,P.; Cantagrel,A.; Le Loet,X.; Flipo,R.; Guis,S.; Combe,B.; Euller-Ziegler,L.; Schaeverbeke,T.; Fautrel,B.; Saraux,A.; Chary-Valckenaere,I.; Chales,G.; Dernis,E.; Richette,P.; Mariette,X.; Berenbaum,F.; Sibilia,J.; Ravaud,P.; Dougados,M.. Impact of a nurse led program on the management of comorbidities in rheumatoid arthritis (RA). Results of a prospective, multicentre, randomized, controlled trial (comedra). Annals of the Rheumatic Diseases 2013;72(Journal Article). Tijhuis 2002

Tijhuis,G. J.; Zwinderman,A. H.; Hazes,J. M.; Van,Den Hout; Breedveld,F. C.; Vliet Vlieland,T. P.. A randomized comparison of care provided by a clinical nurse specialist, an inpatient team, and a day patient team in rheumatoid arthritis. Arthritis Rheum 2002;2002/10/17(Journal Article):525-531. Tijhuis 2003

Tijhuis,G. J.; Zwinderman,A. H.; Hazes,J. M.; Breedveld,F. C.; Vlieland,P. M.. Two-year follow-up of a randomized controlled trial of a clinical nurse specialist intervention, inpatient, and day patient team care in rheumatoid arthritis. J Adv Nurs 2003;2003/01/10(Journal Article):34-43. vanHulst 2010

van Hulst,L. T.; Creemers,M. C.; Fransen,J.; Li,L. C.; Grol,R.; Hulscher,M. E.; van Riel,P. L.. How to improve DAS28 use in daily clinical practice?--a pilot study of a nurse-led intervention.. Rheumatology (Oxford, England) 2010;49(4):741-748.

1. vanHulst 2010a

van Hulst,L. T.; Creemers,M. C.; Fransen,J.; Li,L. C.; Grol,R.; Hulscher,M. E.; van Riel,P. L.. How to improve DAS28 use in daily clinical practice?--a pilot study of a nurse-led intervention. Rheumatology (Oxford) 2010;2010/01/20(Journal Article):741-748. Vinall 2009

Vinall,K.; Ndosi,M.; Hill,J.. Is nurse-led care effective? A systematic review of physician-nurse specialist comparison studies in rheumatology. Rheumatology 2009;48:158-. Watts 2015

Watts,R. A.; Mooney,J.; Barton,G.; MacGregor,A. J.; Shepstone,L.; Irvine,L.; Scott,D. G.. Pmc4550717; The outcome and cost-effectiveness of nurse-led care in the community for people with rheumatoid arthritis: a non-randomised pragmatic study. BMJ Open 2015;2015/08/27(Journal Article):e007696.
