# Supplementary material
Source: HighWire-hosted journal article supplement (https://rmdopen.bmj.com/content/3/2/e000481)
Supplement: inline-supplementary-material-3 [file inline-supplementary-material-3.docx]

| Quality assessment | | | | | | | | | | | | | | Number of patients | | | | Effect |  |
| --- | --- | --- | --- | --- | --- | --- | --- | --- | --- | --- | --- | --- | --- | --- | --- | --- | --- | --- | --- |
| № of studies | | Study design | | | Risk of  bias | Incon-sistency | | | Indirect-ness | | Impre-cision | | | Nurse-led | | Physician-led | | Absolute (95% CI) | **Overall quality** |
| Disease activity (follow up: mean 1 year; assessed with: DAS-28) | | | | | | | | | | | | | | | | | | | |
| 4 | RCT | | | serious a | | | not serious | not serious | | not serious | | | 263 | | 271 | | MD -0.07  (95 % CI -0.2; 0.09) | | MODERATE |
| Disease activity (follow up: mean 2 years; assessed with: DAS-28) | | | | | | | | | | | | | | | | | | | |
| 2 | | | RCT | serious a | | | not serious | not serious | | serious b | | | 124 | | 125 | | MD -0.28 (95% CI -0.53; 0.04 ) | | LOW |
| Patient satisfaction (follow up: mean 1 years; assessed with: Different scales) | | | | | | | | | | | | | | | | | | | |
| 4 | | | RCT | not serious | | | serious c | not serious | | serious d | | | 266 | | 271 | | SMD -0.17 (95% CI -1.0; 0.67) | | LOW |
| Patient satisfaction (follow up: mean 2 years; assessed with: Different scales) | | | | | | | | | | | | | | | | | | | |
| 2 | | | RCT | not serious | | | serious e | not serious | | serious d | | | 123 | | 120 | | SMD 0.6 (95% CI 0.00; 1.20) | | LOW |
| Self-efficacy (follow up: mean 1 years; assessed with: Different scales) | | | | | | | | | | | | | | | | | | | |
| 2 | | | RCT | not serious | | | not serious | not serious | | serious d | | | 184 | | 183 | | SMD 0.3 (95% CI 0.07; 0.54) | | MODERATE |
| Self-efficacy (follow up: mean 2 years; assessed with: Different scales) | | | | | | | | | | | | | | | | | | | |
| 1 | | | RCT | not serious | | | not serious | not serious | | very serious d | | 87 | | | 88 | | MD 23.65 (8.55; 38.75) | | LOW |

RCT: Randomized controlled trail. CI: Confidence interval. MD: Mean difference.SMD: Standardized mean difference. a. Blinding not possible. b. 95 % confidence interval includes both no difference and nurse-led follow-up being more effective than physician-led follow-up. c. I2=95% d. 95% CI wide e. I2=76 %.
