# Supplementary material
Source: HighWire-hosted journal article supplement (https://rmdopen.bmj.com/content/3/2/e000481)

**Supplementary 4**

Fatigue, 1 year


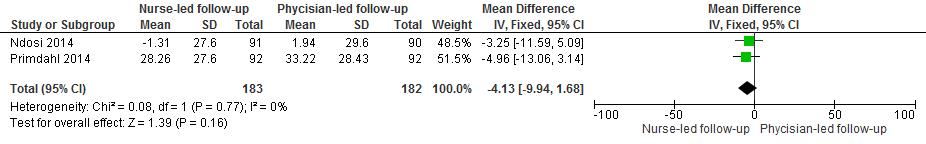


Fatigue 2 year


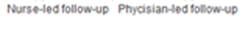

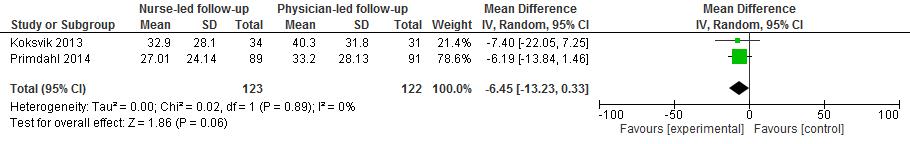


Physical disability 1 year


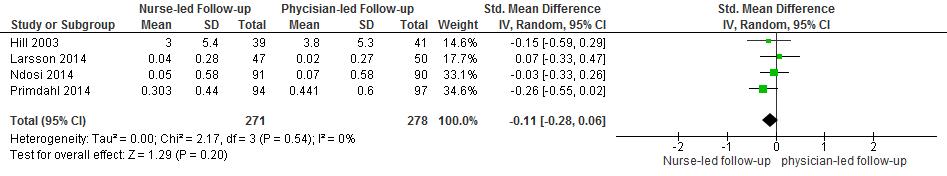


Physical disability 2 year


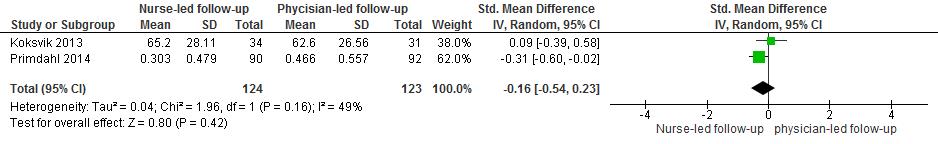


Quality of life, 1 year


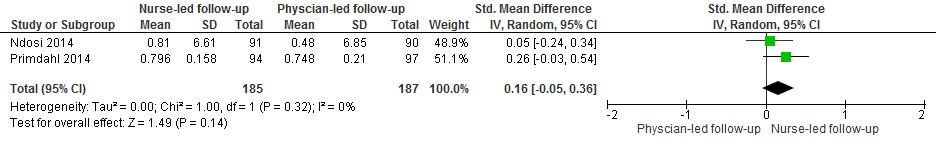


Quality of life, 2 year


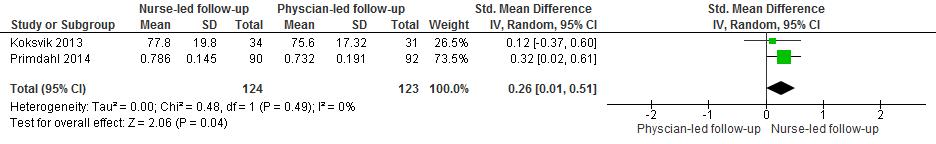

Supplement: inline-supplementary-material-4 [file inline-supplementary-material-4.docx]
